# Supplementary material
Source: Springer Nature journal article supplement (https://www.springermedizin.de/resource/supplementary/13024_2013_522_MOESM1_ESM.pdf/9644372)
Supplement: MOESM1 [file 9644372]

**A**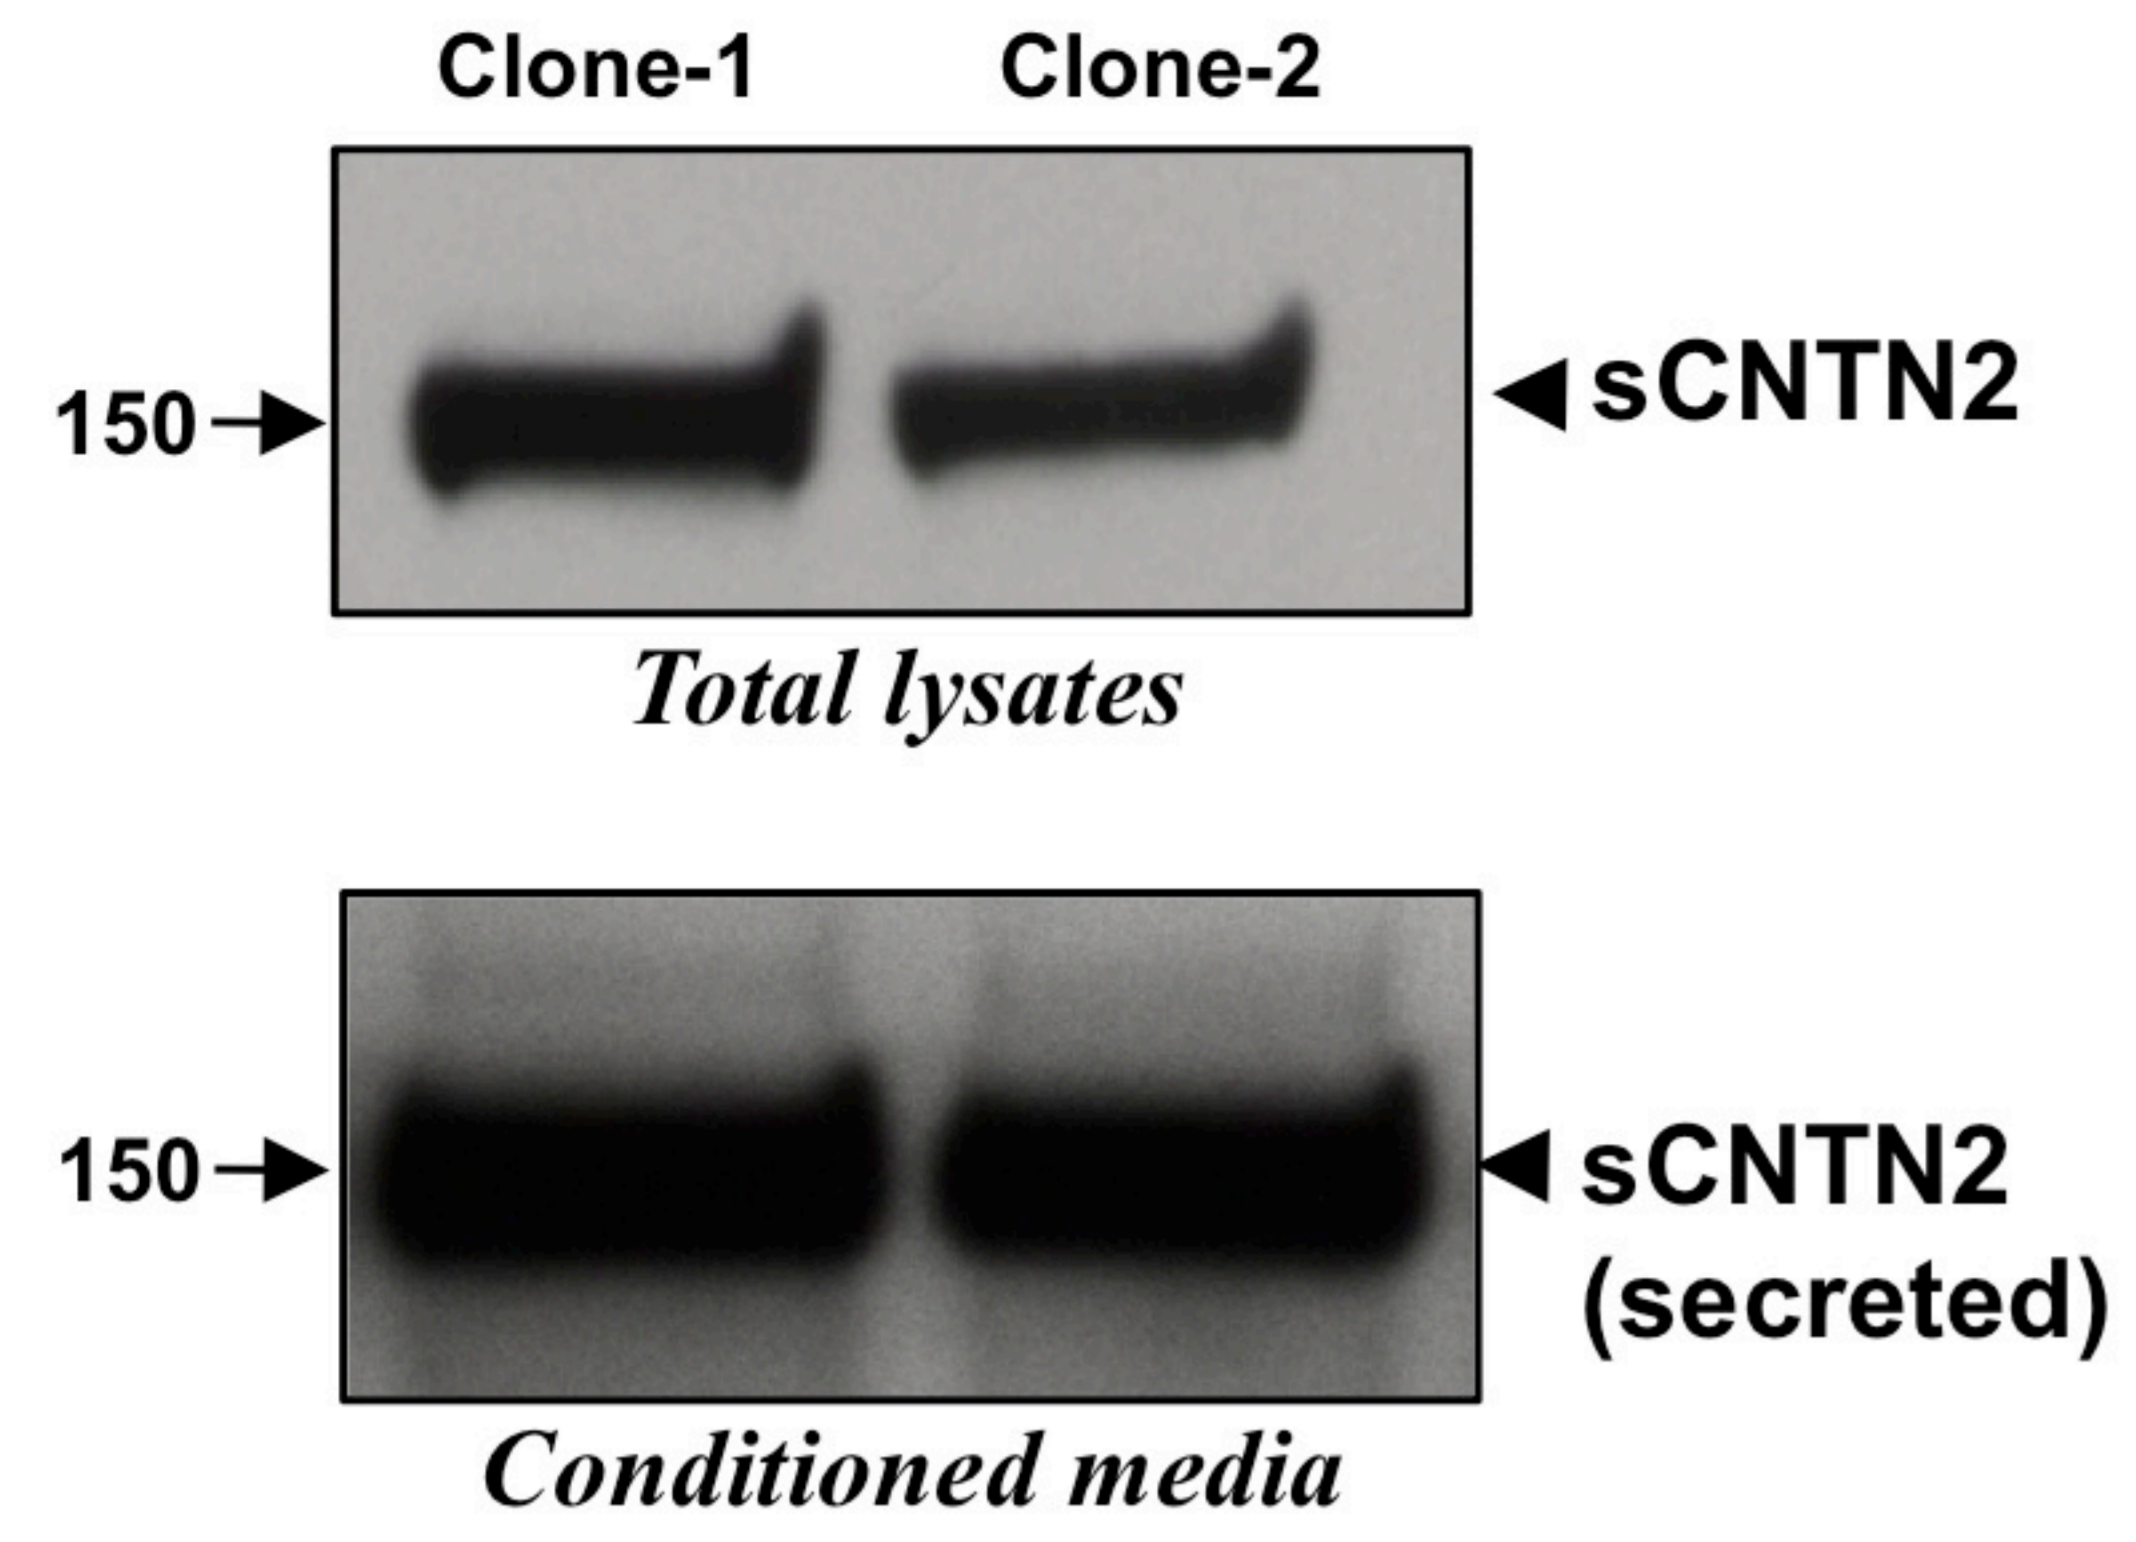**B**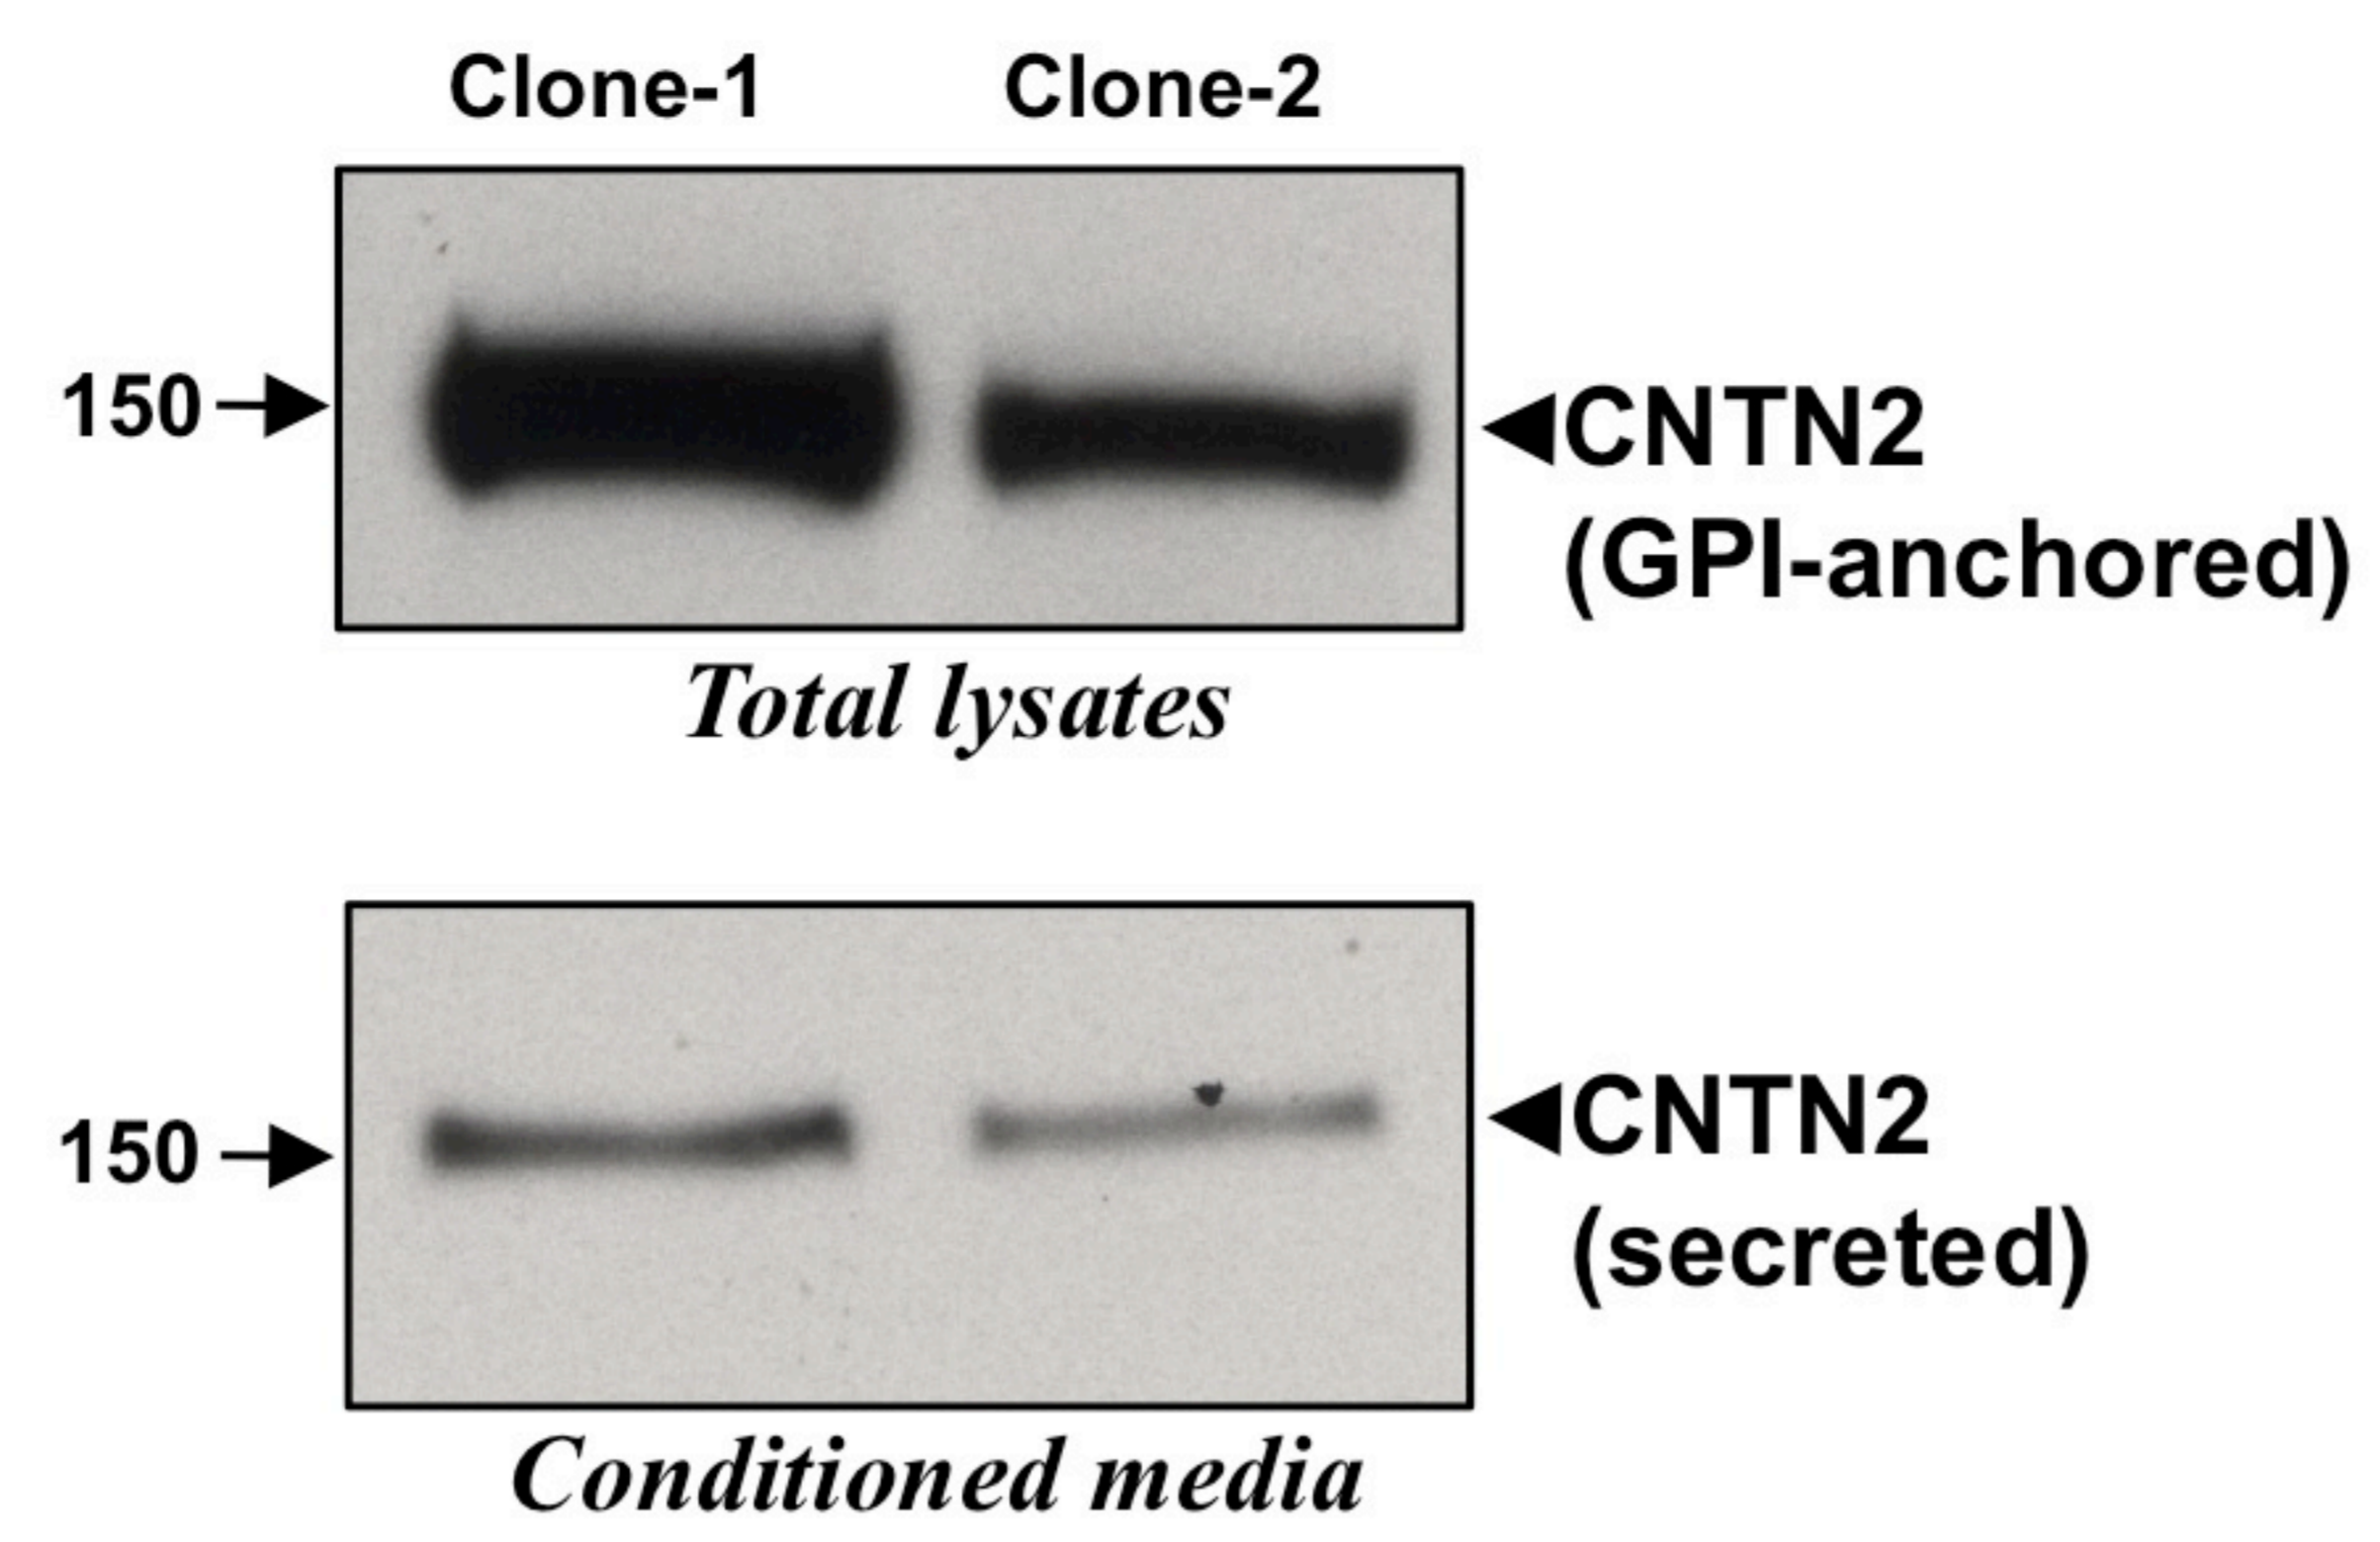

**Supplemental Figure Legends:**

**Supplemental Figure 1. Expression of sCNTN2 and GPI-anchored CNTN2 in CHO cells**

Western blot analysis showed the overexpressed sCNTN2 is mostly secreted into the conditioned media (A) while GPI-anchored CNTN2 is mostly in the total lysate fraction (B).
